# Supplementary material
Source: publisher figshare collection journal article supplement (https://acs.figshare.com/ndownloader/files/25895090)
Supplement: Supplementary file 1 [file 25895090]

## Supporting Information

### Zero-background SERS detection of cymoxanil based on the change of cyano group after UV irradiation

Shuna Mi<sup>a,b,c</sup>, Lijun Ji<sup>d</sup>, Hang Yu<sup>a,b,c</sup>, Yahui Guo<sup>a,b,c</sup>, Yuliang Cheng<sup>a,b,c</sup>, Fangwei Yang<sup>a,b,c,e</sup>,  
Weirong Yao<sup>a,b,c</sup>, Yunfei Xie<sup>a,b,c</sup> \*

<sup>a</sup> State Key Laboratory of Food Science and Technology, Jiangnan University, Wuxi 214122, Jiangsu Province, China

<sup>b</sup> School of Food Science and Technology, Jiangnan University, Wuxi 214122, Jiangsu Province, China

<sup>c</sup> Joint International Research Laboratory of Food Safety, Jiangnan University, Wuxi 214122, Jiangsu Province, China

<sup>d</sup> Suzhou Institute of Production Quality Supervision and Inspection, Suzhou 215128, Jiangsu Province, China

<sup>e</sup> Qingdao Special Food Research Institute, Qingdao 266109, Shandong Province, China

\*Corresponding author. Tel.: +86 0510-85912123.

E-mail address: xieyunfei@jiangnan.edu.cn (Yunfei Xie)

**Figure S1.** The UV-vis spectrum of AuNPs.

**Figure S2.** Calibration curve of cymoxanil with concentrations from 0.1 to 100 mg/L (HPLC).

**Figure S3.** Extracted ion chromatogram of cymoxanil and its photoproducts (A) cymoxanil solution without UV irradiation, (B) cymoxanil solution after UV irradiation (302 nm, 30 min).

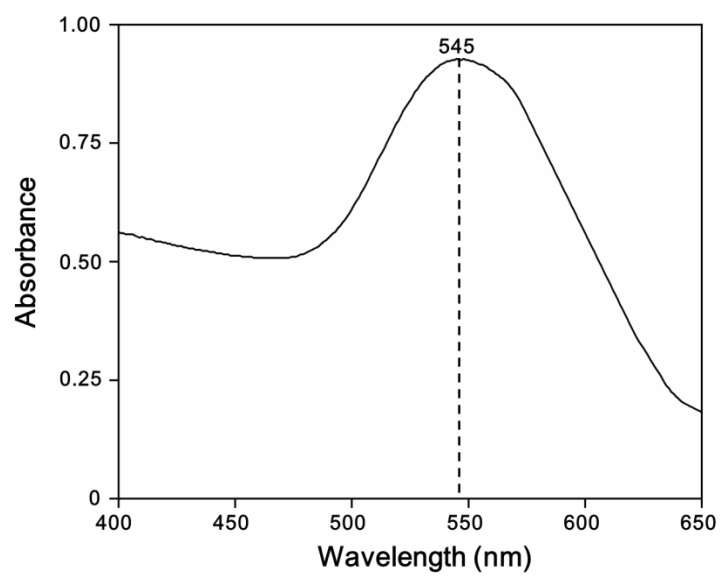

**Figure S1.** The UV-vis spectrum of AuNPs.

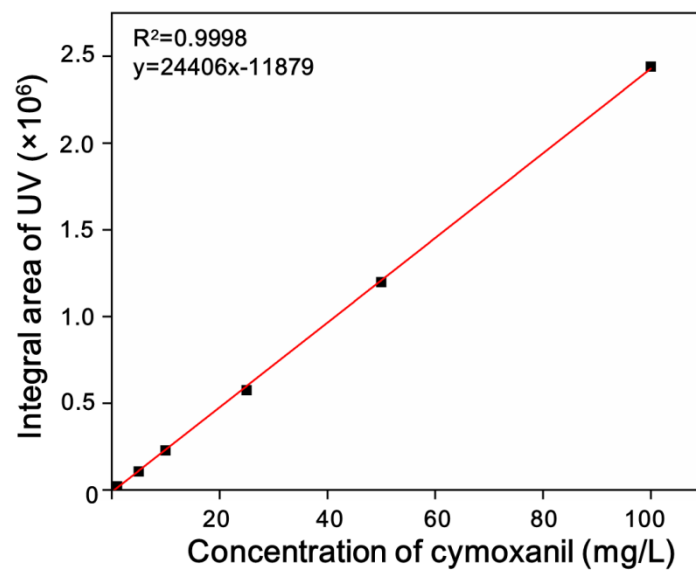

**Figure S2.** Calibration curve of cymoxanil with concentrations from 0.1 to 100 mg/L (HPLC).

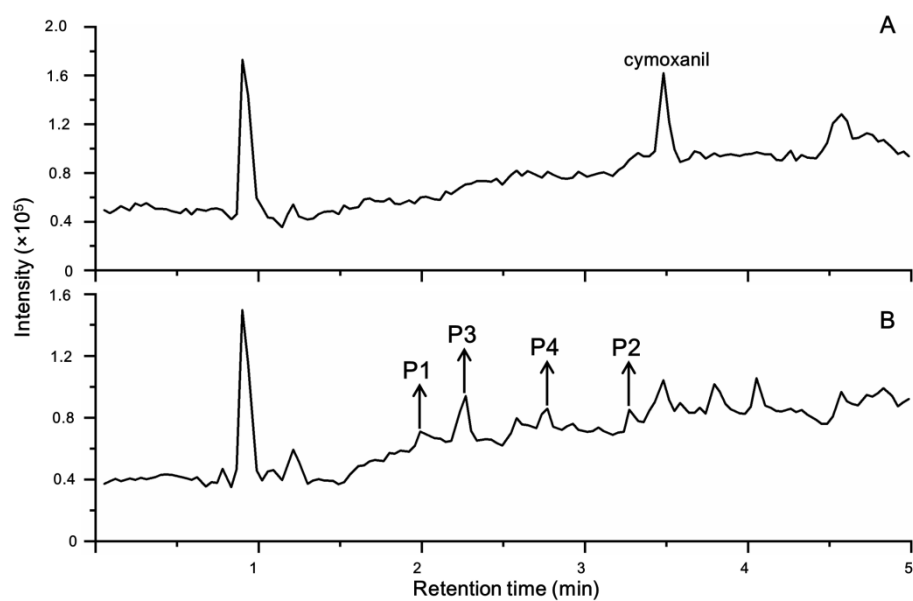

**Figure S3.** Extracted ion chromatogram of cymoxanil and its photoproducts (A) cymoxanil solution without UV irradiation, (B) cymoxanil solution after UV irradiation (302 nm, 30 min).
